# Supplementary material for: Polycyclic Aromatic Hydrocarbons in the Estuaries of Two Rivers of the Sea of Japan
Source: MDPI journal article supplement (doi:10.3390/ijerph17176019), 2020-08-19
Supplement: s1 [file s1]

# Supplementary Materials:

**Table S1.** The quality values of NCs and MPCs for studied compounds taken from [19].

| PAH | C <sub>QV(NCs)</sub> , ng/L | C <sub>QV(MPCs)</sub> , ng/L |
|-----|-----------------------------|------------------------------|
| Ace | 0.7                         | 70                           |
| Fle | 0.7                         | 70                           |
| Ant | 0.7                         | 70                           |
| Flu | 3.0                         | 300                          |
| Pyr | 0.7                         | 70                           |
| BaA | 0.1                         | 10                           |
| Chr | 3.4                         | 340                          |
| BbF | 0.1                         | 10                           |
| BkF | 0.4                         | 40                           |
| BaP | 0.5                         | 50                           |
| DBA | 0.5                         | 50                           |
| BPe | 0.3                         | 30                           |
| IDP | 0.4                         | 40                           |

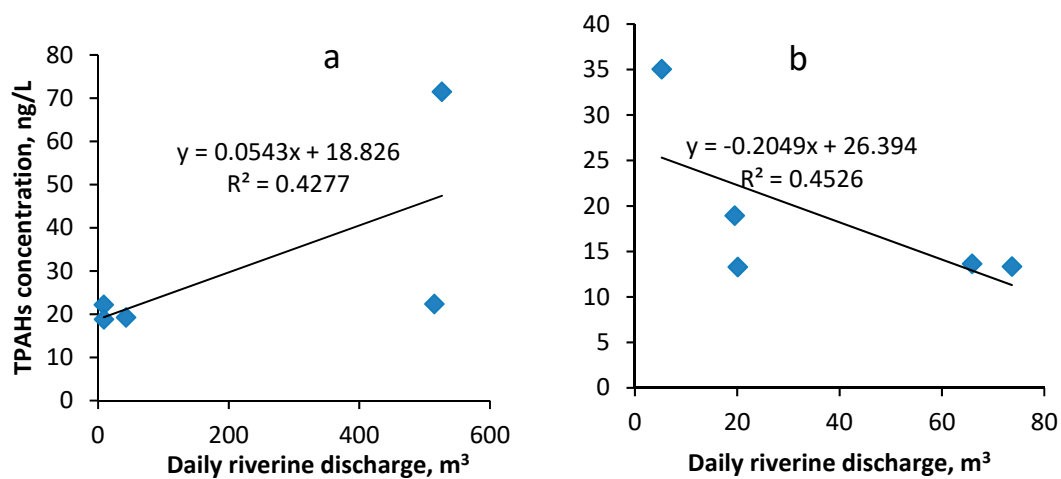

**Figure S1.** Relationship between the mean TPAHs concentration and the daily discharge in the Tumen River estuary (a) and the Partizanskaya River estuary (b).

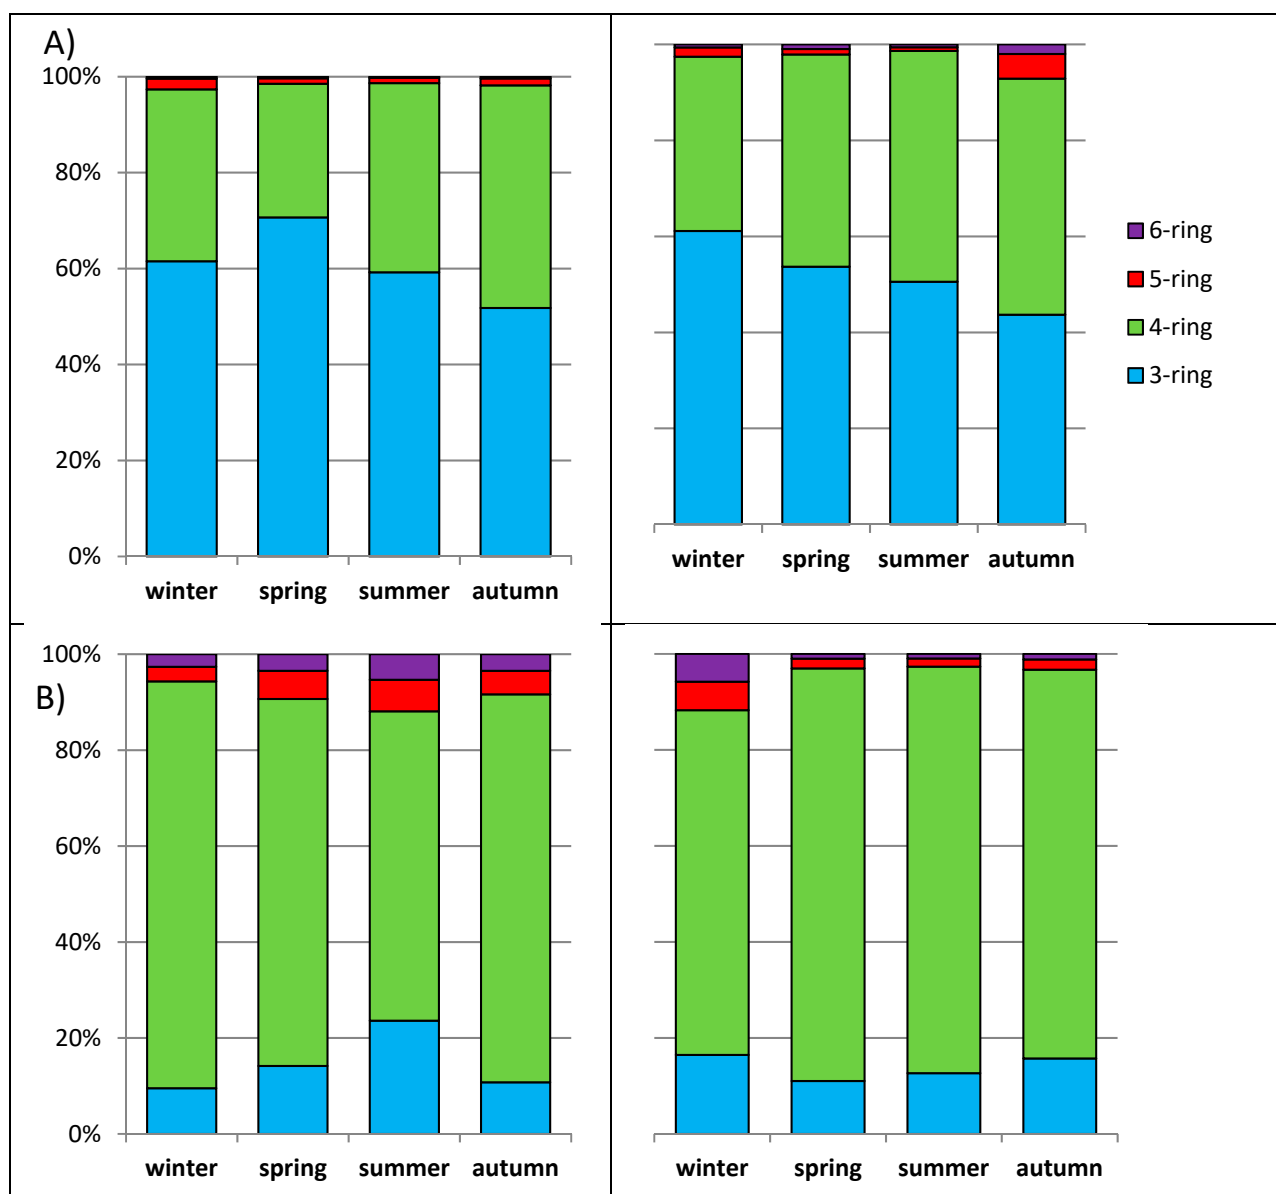

**Figure S2.** (A)—Relative abundance of DPAHs in the Tumen River (left) and Partizanskaya River (right); (B)—Relative abundance of PPAHs in the Tumen River (left) and Partizanskaya River (right).
